# Supplementary material for: Controlled growth and gas sorption properties of IRMOF-3 nano/microcrystals
Source: Royal Society of Chemistry journal article supplement (doi:10.1039/c4dt02429j), 2014-09-23
Supplement: c4dt02429j1.pdf [file c4dt02429j1.pdf]

## *Electronic Supplementary Information (ESI)*

### **Controlled growth and gas sorption property of IRMOF-3 nano/microcrystals**

Ji-Min Yang,<sup>a,b</sup> Qing Liu,<sup>a</sup> Yan-Shang Kang<sup>a</sup> and Wei-Yin Sun<sup>\*a</sup>

<sup>a</sup> *Coordination Chemistry Institute, State Key Laboratory of Coordination Chemistry, School of Chemistry and Chemical Engineering, Nanjing National Laboratory of Microstructures, Nanjing University, Nanjing 210093, China. E-mail: sunwy@nju.edu.cn; Fax: +86 25 83314502*

<sup>b</sup> *School of Chemistry & Chemical Engineering, Linyi University, Linyi 276005, China*

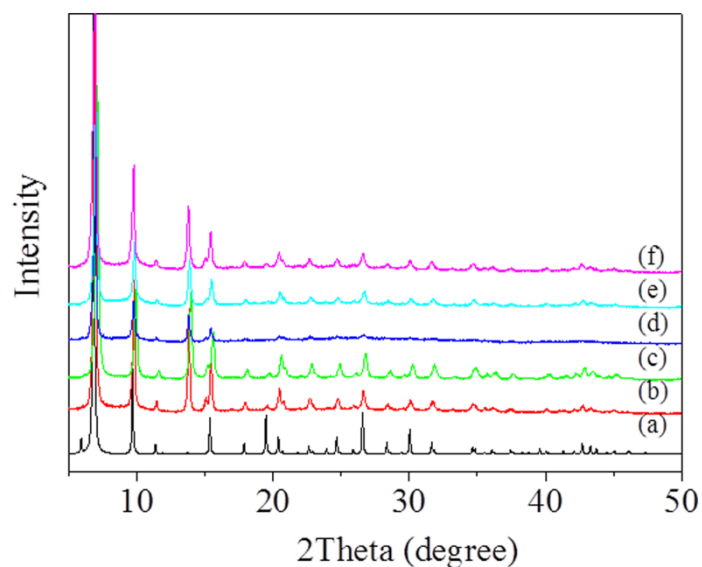

**Fig. S1** PXRD patterns of simulated IRMOF-3 and the samples synthesized at 120 °C with different amounts of CTAB: (a) simulated, (b) 0, (c) 5, (d) 8, (e) 12 and (f) 15 mg.

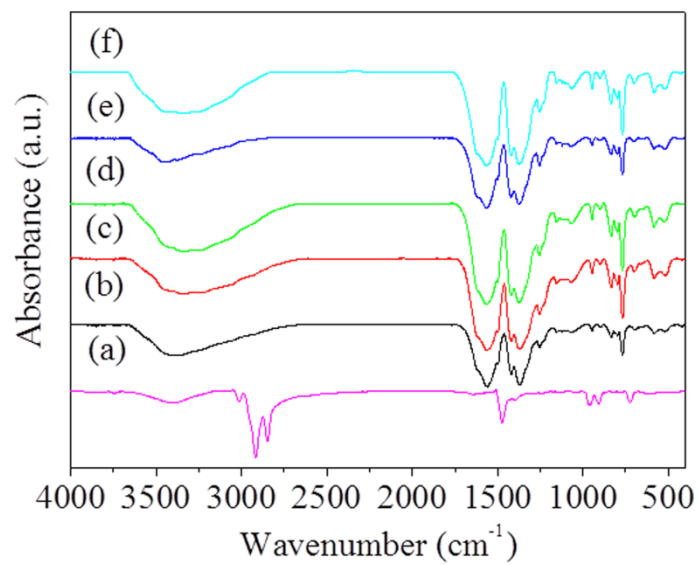

**Fig. S2** FT-IR spectra of CTAB and the samples synthesized at 110 °C with different amounts of CTAB: (a) CTAB, (b) 0, (c) 5, (d) 8, (e) 12 and (f) 15 mg.

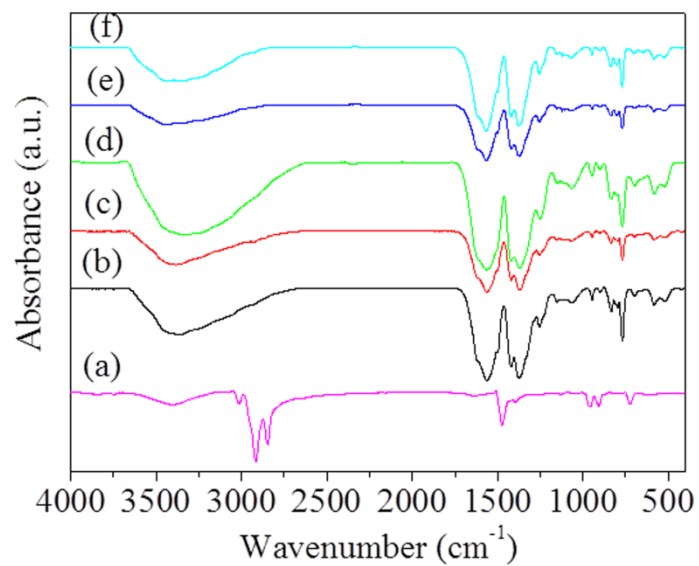

**Fig. S3** FT-IR spectra of CTAB and the samples synthesized at 120 °C with different amounts of CTAB: (a) CTAB, (b) 0, (c) 5, (d) 8, (e) 12 and (f) 15 mg.

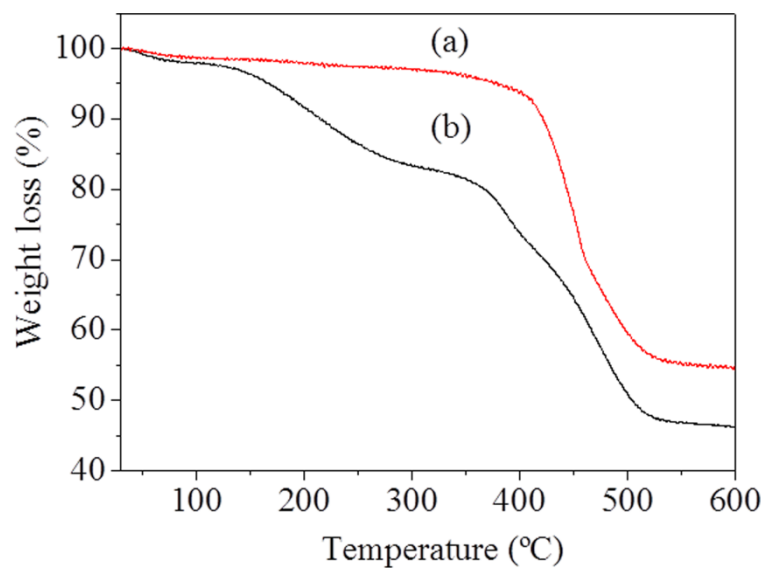

**Fig. S4** TGA curves of (a) activated IRMOF-3 and (b) as-obtained IRMOF-3

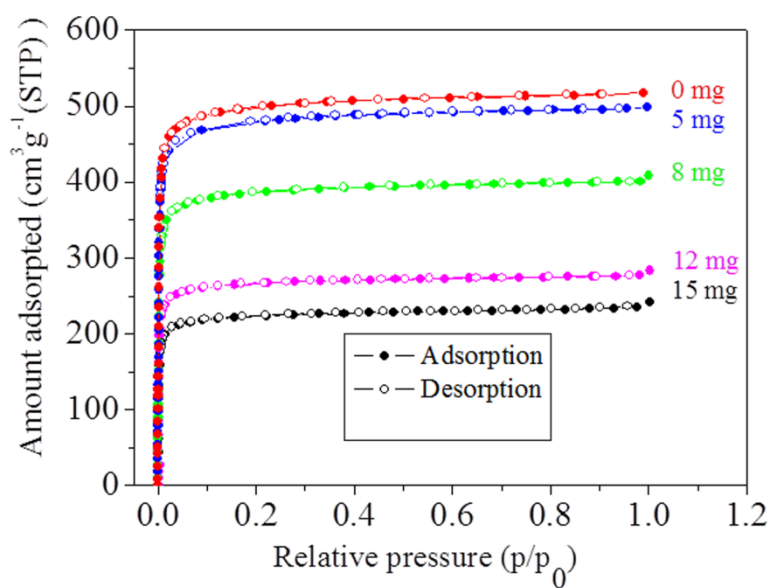

**Fig. S5** Nitrogen sorption isotherms of the products synthesized at 120 °C with different amounts of CTAB at 77 K. (In the isotherms, solid and open markers represent adsorption and desorption points, respectively.)

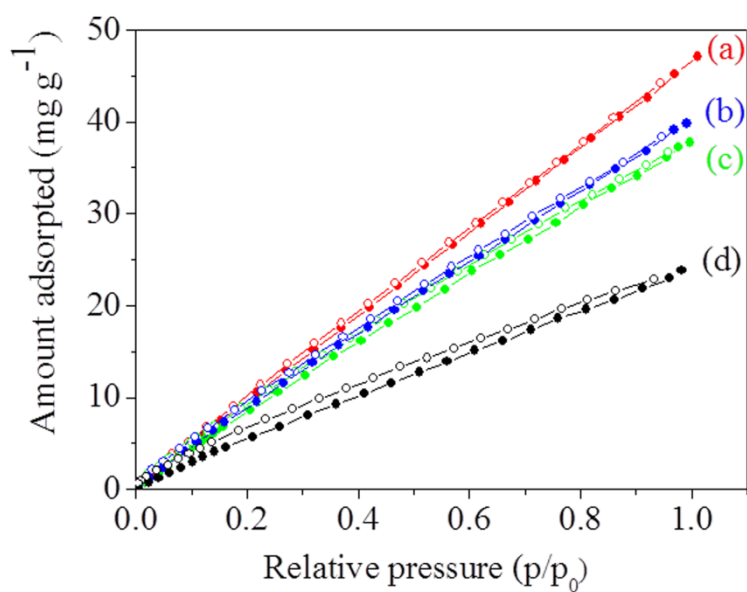

**Fig. S6** CO<sub>2</sub> sorption isotherms at 298 K of the products synthesized at different temperatures and amounts of CTAB: (a) 110 °C, 0 mg, (b) 120 °C, 0 mg, (c) 110 °C, 15 mg and (d) 120 °C, 15 mg.
